# Supplementary material
Source: Research Square preprint supplement (doi:10.21203/rs.3.rs-10034791/v1)
Supplement: Supplementary file 1 [file 4b1cb97ba684f001ba7f6139.docx]

# Appendix A Measurement domains

| **Construct** | **Items** | **Measurement focus** |
| --- | --- | --- |
| General Cybersecurity Awareness | 6 | General understanding of cyber threats, secure conduct, institutional exposure, and consequences of insecure behavior. |
| Password Security Practices | 5 | Authentication discipline, password confidentiality, and safe access behavior. |
| Phishing Awareness | 5 | Recognition of suspicious messages, malicious links, deceptive requests, and verification behavior. |
| Device Security Practices | 5 | Secure use of institutional devices, endpoint discipline, update behavior, and access protection. |
| Policy Compliance | 9 | Adherence to formal information-security rules, data-handling procedures, reporting expectations, and control routines. |
| Financial Data Protection | 12 | Protection of financial and customer data from unauthorized access, leakage, alteration, misuse, or loss. |
