# Supplementary material
Source: Research Square preprint supplement (doi:10.21203/rs.3.rs-10034791/v1)
Supplement: Supplementary file 2 [file 8e4ab9c06cf6f18183117654.docx]

**Supplementary File 2**

**Survey Questionnaire**

**Cybersecurity Awareness, Policy Compliance, and Financial Data Protection in Accounting Information Systems: Evidence from Somali Financial Institutions**

**Participant information**

This questionnaire was used to collect anonymous survey data from employees working in Somali financial institutions. The purpose of the study was to examine cybersecurity awareness, policy compliance, and financial data protection practices in accounting information systems.

Participation was voluntary. Respondents were not asked to provide names, phone numbers, email addresses, staff identification numbers, institution names, or other direct personal identifiers. Responses were used only for academic research and were analyzed in aggregate form.

**Response scale for Sections B-H**

| **1** | **2** | **3** | **4** | **5** |
| --- | --- | --- | --- | --- |
| Strongly disagree | Disagree | Neutral | Agree | Strongly agree |

**Section A: Demographic information**

Respondents selected one option for each item.

| **No.** | **Question** | **Response options** |
| --- | --- | --- |
| 1 | Gender | Male; Female |
| 2 | Age group | 18-25; 26-35; 36-45; 46 and above |
| 3 | Current position | Operations Officer; Customer Service Officer; Teller; IT / ICT Officer; Accountant / Finance Officer; Branch Manager; Compliance / Risk Officer; Internal Auditor |
| 4 | Department | Operations; Finance / Accounting; Customer Service; Compliance / Risk; ICT / Information Security; Internal Audit; Administration |
| 5 | Years of experience | Less than 1 year; 1-3 years; 4-6 years; 7-10 years; More than 10 years |
| 6 | Type of financial institution | Islamic Bank; Conventional Bank; Mobile Money / Financial Service Provider; Microfinance Institution |

**Section B: General Cybersecurity Awareness**

| **Code** | **Questionnaire item** | **Scale** |
| --- | --- | --- |
| B1 | I understand the basic principles of cybersecurity in my workplace. | 1-5 |
| B2 | I am aware of common cybersecurity threats that may affect financial institutions. | 1-5 |
| B3 | I understand the risks of using unsecured networks when handling work-related information. | 1-5 |
| B4 | I regularly receive or access information about cybersecurity risks and safe practices. | 1-5 |
| B5 | I understand the importance of protecting customer and financial information. | 1-5 |
| B6 | I understand the possible consequences of cybersecurity breaches for financial institutions. | 1-5 |

**Section C: Password Security Practices**

| **Code** | **Questionnaire item** | **Scale** |
| --- | --- | --- |
| C1 | I use strong passwords for work-related systems and accounts. | 1-5 |
| C2 | I change my passwords regularly or when required by institutional policy. | 1-5 |
| C3 | I do not share my passwords or login credentials with other people. | 1-5 |
| C4 | I am familiar with multi-factor authentication or additional login verification methods. | 1-5 |
| C5 | I understand the importance of secure authentication in protecting financial information. | 1-5 |

**Section D: Phishing Awareness**

| **Code** | **Questionnaire item** | **Scale** |
| --- | --- | --- |
| D1 | I can identify phishing emails, suspicious messages, or fake requests. | 1-5 |
| D2 | I avoid clicking suspicious links or opening unexpected attachments. | 1-5 |
| D3 | I verify unusual requests before sharing information or taking action. | 1-5 |
| D4 | I am aware of social engineering techniques used to deceive employees. | 1-5 |
| D5 | I understand how phishing attacks can affect financial data and accounting systems. | 1-5 |

**Section E: Device Security Practices**

| **Code** | **Questionnaire item** | **Scale** |
| --- | --- | --- |
| E1 | I keep work devices and software updated when required. | 1-5 |
| E2 | I avoid installing unauthorized software on work-related devices. | 1-5 |
| E3 | I understand the risks of using unknown USB drives or external storage devices. | 1-5 |
| E4 | I report unusual device behavior, system errors, or suspected security issues. | 1-5 |
| E5 | I lock or secure my computer or device when it is not in use. | 1-5 |

**Section F: Policy Compliance**

| **Code** | **Questionnaire item** | **Scale** |
| --- | --- | --- |
| F1 | My institution has clear cybersecurity and information-security policies. | 1-5 |
| F2 | I understand the guidelines for handling financial and customer information. | 1-5 |
| F3 | I comply with access-control procedures when using financial systems. | 1-5 |
| F4 | I access financial data only when I am authorized to do so. | 1-5 |
| F5 | I log out of financial systems after completing my work. | 1-5 |
| F6 | I report suspected cybersecurity incidents according to institutional procedures. | 1-5 |
| F7 | I follow institutional rules regarding the use of personal devices for work purposes. | 1-5 |
| F8 | Cybersecurity and data-protection policies are strictly enforced in my institution. | 1-5 |
| F9 | My institution provides cybersecurity drills, reminders, or training activities. | 1-5 |

**Section G: Financial Data Protection**

| **Code** | **Questionnaire item** | **Scale** |
| --- | --- | --- |
| G1 | Access to financial data is restricted to authorized employees only. | 1-5 |
| G2 | Financial and customer information is protected from unauthorized access. | 1-5 |
| G3 | Role-based access controls are used to protect sensitive financial information. | 1-5 |
| G4 | Financial data are recorded and processed accurately in the institution's systems. | 1-5 |
| G5 | Controls are in place to prevent unauthorized modification of financial records. | 1-5 |
| G6 | Changes to financial records are logged or traceable when required. | 1-5 |
| G7 | Financial information systems are reliable and available when needed for work. | 1-5 |
| G8 | Backup mechanisms are used to protect important financial data. | 1-5 |
| G9 | Recovery procedures are tested or available to restore financial information when needed. | 1-5 |
| G10 | Segregation of duties is used to reduce financial-data misuse or manipulation. | 1-5 |
| G11 | Internal controls help protect financial data from fraud or unauthorized changes. | 1-5 |
| G12 | Cybersecurity and internal-control practices reduce risks to financial data protection. | 1-5 |

**Section H: Perceived Effectiveness of Cybersecurity Measures**

| **Code** | **Questionnaire item** | **Scale** |
| --- | --- | --- |
| H1 | Cybersecurity awareness improves the protection of financial information in my institution. | 1-5 |
| H2 | Cybersecurity training helps employees protect financial and customer data. | 1-5 |
| H3 | Secure work practices improve the safety of accounting information systems. | 1-5 |
| H4 | My institution is prepared to respond to cybersecurity incidents affecting financial data. | 1-5 |
| H5 | Current cybersecurity measures are adequate for protecting financial data. | 1-5 |
| H6 | Management gives sufficient attention to cybersecurity and financial data protection. | 1-5 |

**Instrument summary**

| **Section** | **Construct / variable** | **Number of items** |
| --- | --- | --- |
| A | Demographic information | 6 |
| B | General Cybersecurity Awareness | 6 |
| C | Password Security Practices | 5 |
| D | Phishing Awareness | 5 |
| E | Device Security Practices | 5 |
| F | Policy Compliance | 9 |
| G | Financial Data Protection | 12 |
| H | Perceived Effectiveness of Cybersecurity Measures | 6 |
